# Supplementary material for: Targeted Exome Sequencing of Genes Involved in Rare CNVs in Early-Onset Severe Obesity
Source: Front Genet. 2022 Mar 7;13:839349. doi: 10.3389/fgene.2022.839349 (PMC8940233; doi:10.3389/fgene.2022.839349)
Supplement: Supplementary file 2 [file Table1.XLSX]

## Sheet: Sheet1
Supplemental Table 1. List of the 117 genes involved in previously identified rare CNVs
ACE
ACP6
AIFM3
ALDOA
ARVCF
ASPHD1
ATR
BAZ2B
BCL9
BCRP5
BRAF
C16orf54
C16orf92
C20orf7
C22orf29
C22orf39
CCDC37
CCDC85A
CDC45
CDIPT
CHD1L
CLDN5
CLTCL1
COMT
CRKL
DGCR14
DGCR2
DGCR5
DGCR6
DGCR6L
DGCR8
DHRS12
DOC2A
DPP6
EFEMP1
ESF1
FAM230A
FAM57B
FLRT3
FMO5
GGTLC3
GJA5
GNB1L
GP1BB
GSC2
HIRA
HIRIP3
INO80E
ISM1
KCTD13
KIF22
KLF15
KLHL22
LZTR1
MACROD2
MAMLD1
MAZ
MBD5
MCTP2
MED15
MIR1286
MIR1306
MIR185
MIR216A
MIR216B
MIR217
MIR3618
MIR4761
MIR649
MRPL40
MVP
NDE1
PAGR1
PCM1
PDIA3P
PI4KA
PLS1
PPP4C
PRKAB2
PRODH
PRRT2
QPRT
RANBP1
RIMBP3
RTN4R
SCARF2
SEL1L2
SEPT5
SERPIND1
SEZ6L2
SLC25A1
SLC7A4
SLC9A3P2
SNAP29
SNX29
SORBS1
SORCS1
SPN
TANGO2
TAOK2
TASP1
TBX1
TBX6
THAP7
TMEM191A
TMEM219
TRMT2A
TSSK2
TXNRD2
UFD1L
USP41
VPS13D
XRN1
ZDHHC8
ZG16
ZNF74
ZXDC
